# Supplementary material
Source: Springer Nature journal article supplement (https://www.springermedizin.de/resource/supplementary/13075_2013_4186_MOESM3_ESM.pdf/9696300)

A

**Cumulative Probability for 2-year change in Fat Metaplasia**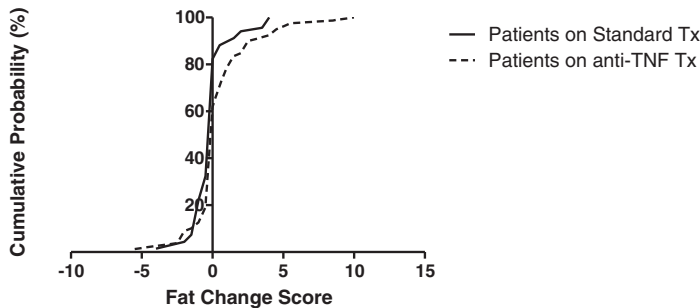

B

**Cumulative Probability for 2-year change in Erosion**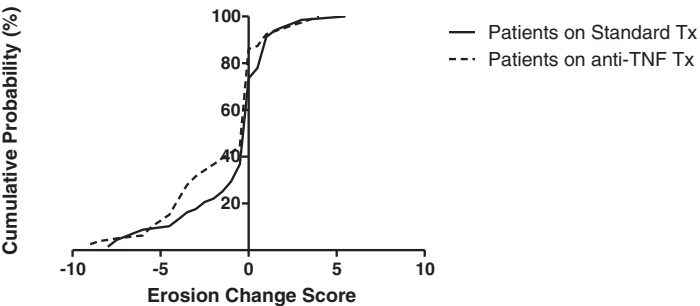

Supplement: MOESM3 [file 9696300]
